# Supplementary material for: Collective absorption of 2,4,6-trinitrotoluene into lipid membranes and its effects on bilayer properties. A computational study
Source: Royal Society of Chemistry journal article supplement (doi:10.1039/c9ra08408h), 2019-01-01
Supplement: c9ra08408h1.pdf [file c9ra08408h1.pdf]

Supporting information for:

**Collective Absorption of 2,4,6-Trinitrotoluene  
into Lipid Membranes and Its Effects on Bilayer  
Properties. A Computational Study**

*Hong Yang,<sup>†,‡</sup> Mi Zhou,<sup>‡</sup> Huarong Li,<sup>‡</sup> Liu Liu,<sup>‡</sup> Yang Zhou,<sup>‡,\*</sup> Xinping Long<sup>‡</sup>*

<sup>†</sup> School of Material Science and Engineering, Tsinghua University, Beijing  
100084, China;

<sup>‡</sup> Institute of Chemical Materials, China Academy of Engineering and  
Physics, Mianyang 621900, China.

\*To whom Correspondence should be addressed: zhouy@caep.cn (Y. Zhou)

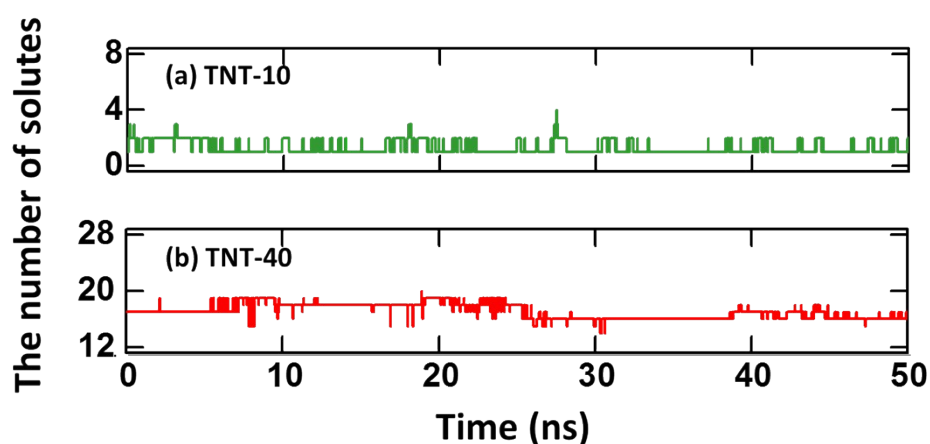

**Figure S1.** The number of TNT molecules contained in the largest aggregate with the simulation time for (a) TNT-10 system, and (b) TNT-40 system.

**Table S1.** The area per lipid and thickness of membrane in different systems.

| System             | Thickness [nm]      | Area per lipid [ $\text{\AA}^2$ ] |
|--------------------|---------------------|-----------------------------------|
| Pure POPC membrane | 3.89 ( $\pm 0.06$ ) | 64.7 ( $\pm 1.2$ )                |
| TNT-10 system      | 3.88 ( $\pm 0.07$ ) | 65.9 ( $\pm 1.5$ )                |
| TNT-40 system      | 3.84 ( $\pm 0.06$ ) | 65.6 ( $\pm 1.3$ )                |

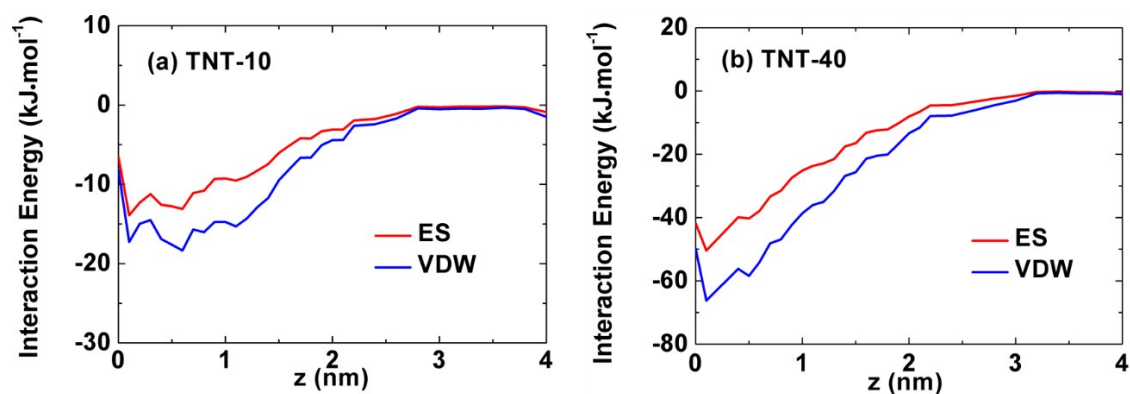

**Figure S2.** Interaction energy decomposition [electrostatic interaction (ES) and van der Waals interactions (VDW)] of the incoming TNT with the remaining TNT molecules in (a) TNT-10 system, and (b) TNT-40 system, as a function of the distance from the bilayer center.

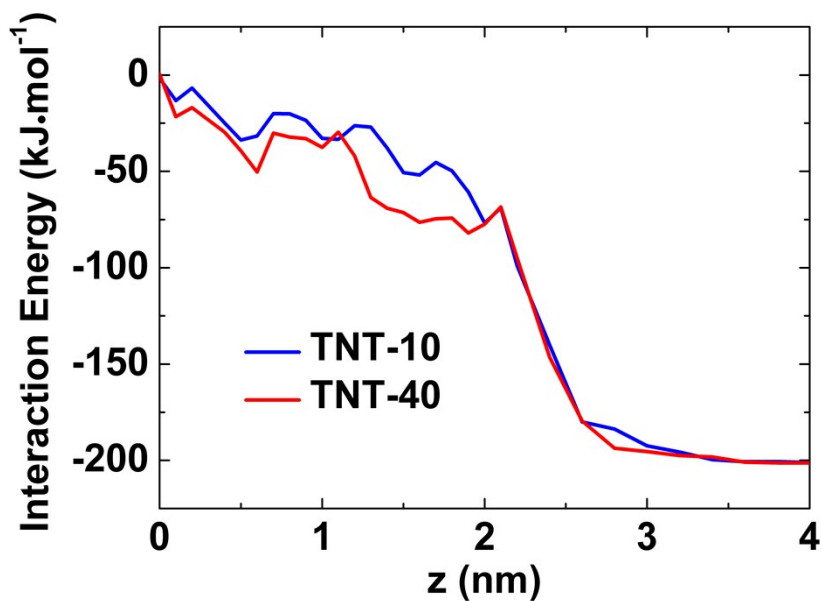

**Figure S3.** Interaction energy of the incoming TNT with solvent molecules in different systems, as a function of the distance from the bilayer center.

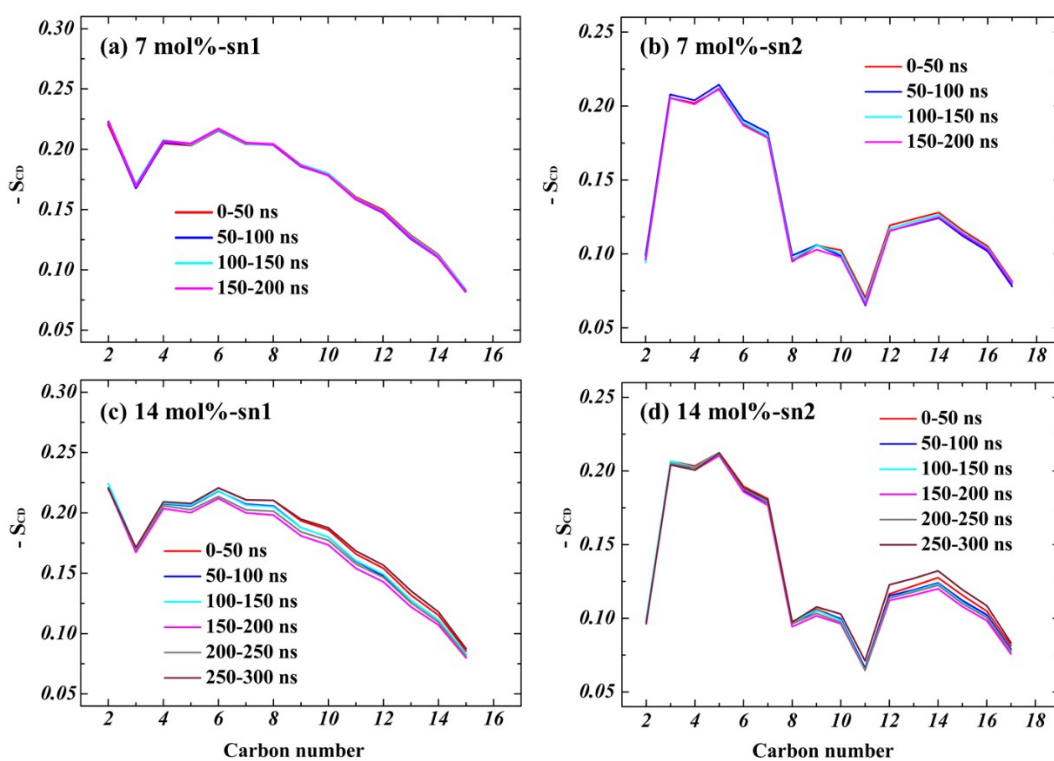

**Figure S4.** Deuterium order parameters ( $-S_{CD}$ ) of POPC lipids with various TNT concentrations as a function of simulation time.
